# Supplementary material for: FBXW7 tumor suppressor regulation by dualspecificity tyrosine-regulated kinase 2
Source: PubMed Central journal article supplement (PMC10024693; doi:10.1038/s41419-023-05724-0), 2023-03-18

# Supplemental Figure 1

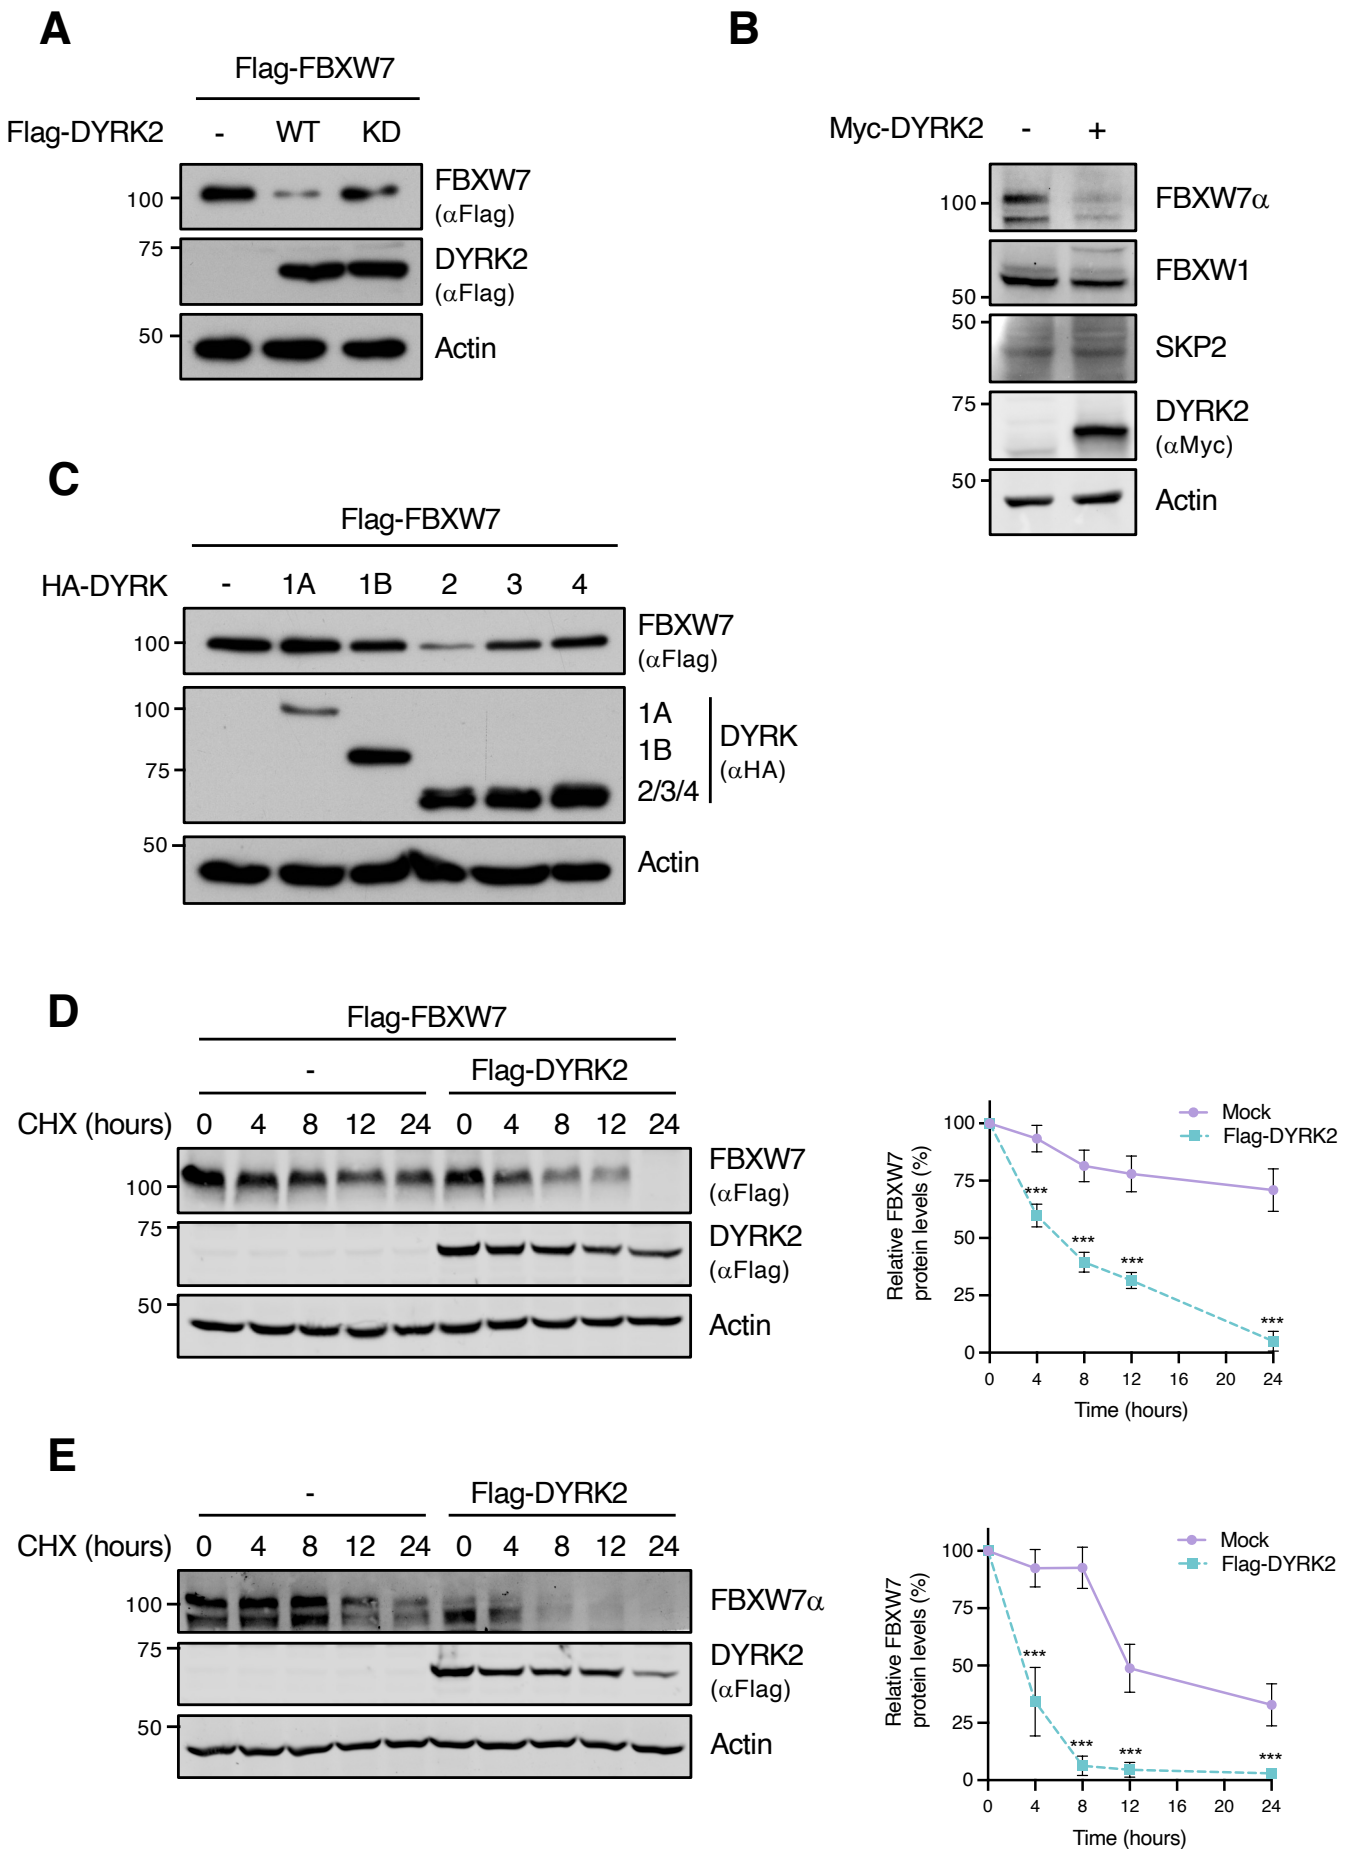

**F**

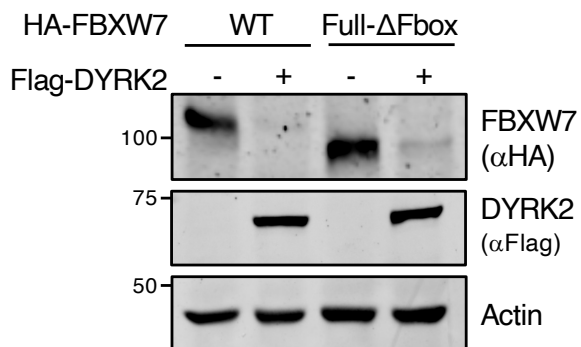

**G**

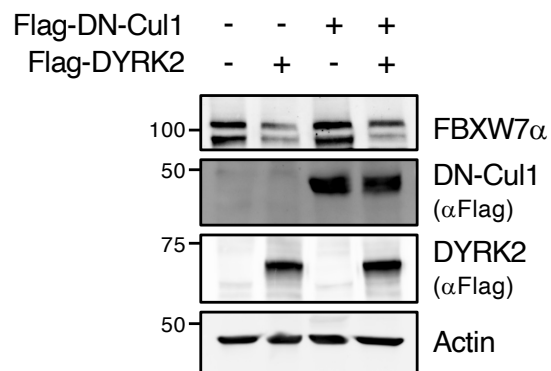

**H**

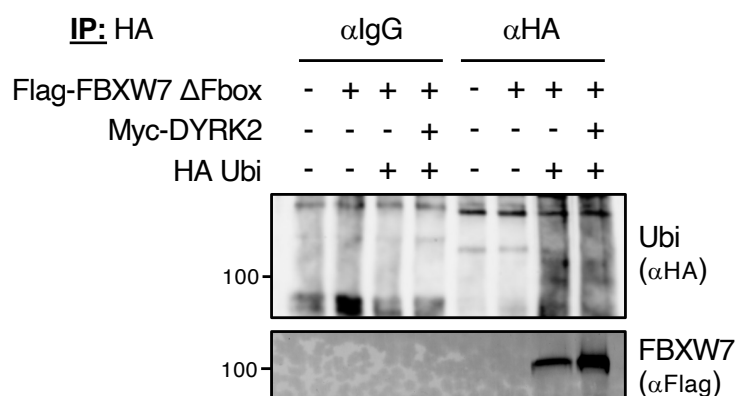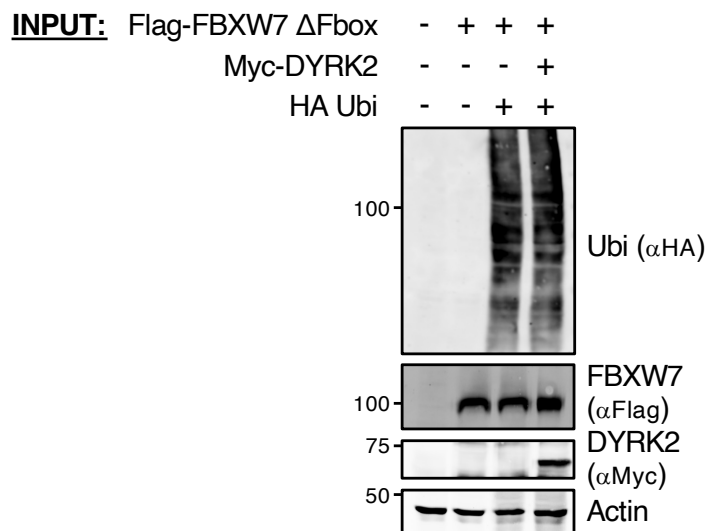

# Supplemental Figure 2

**A**

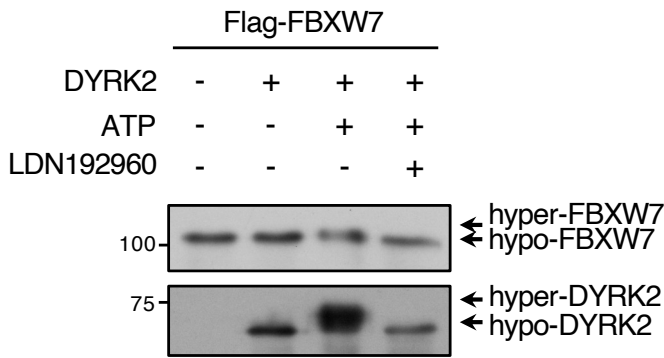

**B**

```

10      20      30      40      50
MNQELLSVGS KRRRTGGSLR GNFSSSQVDE EQMNRVVEE QQQQLRQEE
60      70      80      90      100
EHTARNGEVV GVEPRPGGQN DSQQGLEEN NNRFISVDED SSGNQEEQE
110     120     130     140     150
DEEHAGEQDE EDEEEEMDQ ESDDFDQSD SSREDEHHT NSVTNSSSIV
160     170     180     190     200
DLPVHQLSSP FYTKTTMKR KLDHGSEVRS FSLGKKPKV SEYTSTTGLV
210     220     230     240     250
PCSAIPITFG DLRAANGQGQ QRRRITSVQP PTGLQEWLKM FQSWSGPEKL
260     270     280     290     300
LALDELIDSC EPTQVQHMMQ VIEPQFQDF ISLLPKELAL YVLSFLEPKD
310     320     330     340     350
LLQAAQTCRY WRILAEDNLL WREKCKEEGI DEPLHIKRRK VIKPGFIHSP
360     370     380     390     400
WKSAYIRQHR IDTNWRRGEL KSPKVLKGDH DHVITCLQFC GNRIVSGSDD
410     420     430     440     450
NTLKVSAVT GKCLRTLGVH TGGVWSSQMR DNIISGSTD RTLKVWNAET
460     470     480     490     500
GECIHTLYGH TSTVRCMHLH EKRVSVSGRD ATLRVWDIET GQCLHVLGMH
510     520     530     540     550
VAAVRCVQYD GRRVVSQAYD FMVKVDPET ETCLHTLQGH TNRVYSLQFD
560     570     580     590     600
GIHVSVGLD TSIRVDVET GNCIHTLGH QSLTSGMELK DNLVLSGNAD
610     620     630     640     650
STVKIWDIKT GQCLQLQGP NKHQSAVTC LQFNKNFVTS SDDGTVKLWD
660     670     680     690     700
LKTGEFIRNL VTLESGSGG VVWRIRASNT KLVCAVGSRN GTEETKLLVL
DFDVKMK
    
```

**C**

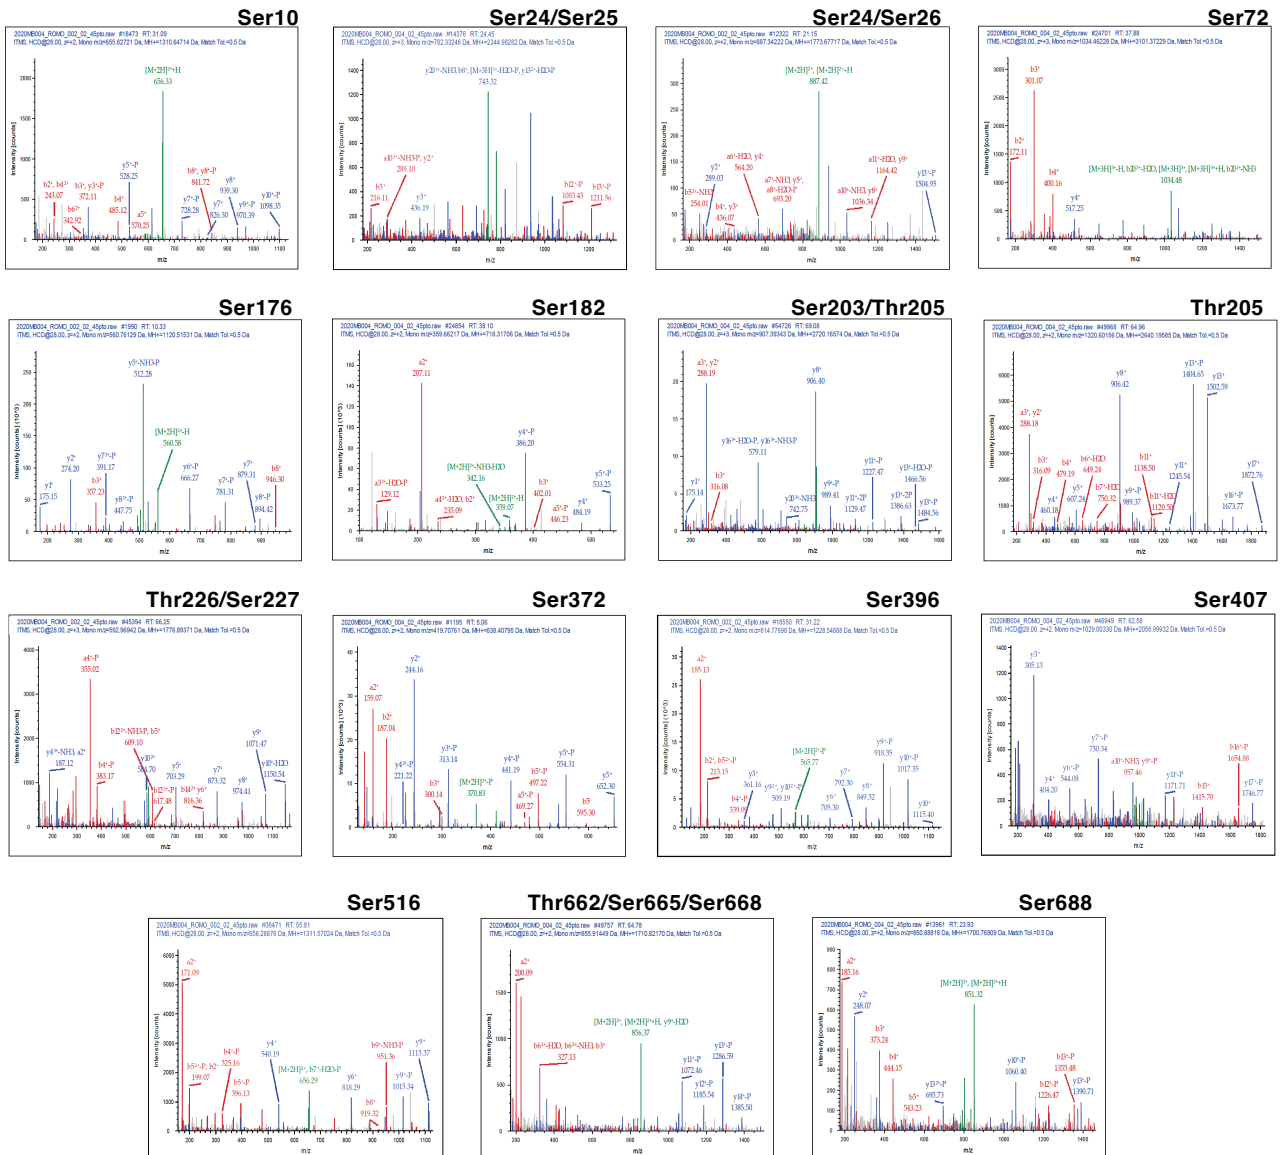

D

|                            |                                                            |                                                           |                                |               |        |     |
|----------------------------|------------------------------------------------------------|-----------------------------------------------------------|--------------------------------|---------------|--------|-----|
|                            | <b>S10</b>                                                 | <b>S18 S24/25/26</b>                                      |                                |               |        |     |
| <i>H. sapiens</i>          | MNQELLVSGSKRRRTGGS                                         | LRGNPSSSQVDEEQMNRVVEEEQQQLRQEQEEHTARNGEV                  | 60                             |               |        |     |
| <i>M. musculus</i>         | MNQELLVSGSKRRRTGGS                                         | LRGNASSQVDEEQMNRVVEEDPQQARHQEEHTARNGELV                   | 60                             |               |        |     |
| <i>B. taurus</i>           | -----                                                      | -----                                                     | 0                              |               |        |     |
| <i>G. gallus</i>           | MNQELLVSGSKRRRTGGS                                         | LRANASSQVDEEQMNRVVEEEQQRQQEQEHIGRNGEIR                    | 60                             |               |        |     |
| <i>X. laevis</i>           | MNQELLVSGSKRRRTGGS                                         | VRGNASSQADEEQMNRVVEEEQQ-----QEHIIVLNGEID                  | 55                             |               |        |     |
| <b>S72</b>                 |                                                            |                                                           |                                |               |        |     |
| <i>H. sapiens</i>          | GVEPRPGQND                                                 | SQQGLEENNRIFISVDEDESSGNQEE-----QEEDDEHAGE---QDEE          | 111                            |               |        |     |
| <i>M. musculus</i>         | GANPRPGQND                                                 | TQQGQVEENNRIFISVDEDESSGNQEEQ-----EEDDEHAGEQEEEEEE         | 114                            |               |        |     |
| <i>B. taurus</i>           | -----                                                      | -----MCVPRSGILSCLCYGVLLPVLLPNLPFLTCLSMS                   | 37                             |               |        |     |
| <i>G. gallus</i>           | E-EPGFDRRE                                                 | SQQGLEENNRILITVDEESTCNQEE-----DDDEHAGDQ---EEE             | 108                            |               |        |     |
| <i>X. laevis</i>           | GDAPGSLERNEPQEHLEENNSCTIAD-QESADQPGHEHLSHQDEDEDEEAC---DAED |                                                           | 111                            |               |        |     |
| <i>H. sapiens</i>          | DEEEEEMDQESDDFDQSDSSREDEHTHTNSVTNSSSIVDLPVHQLS-SPFYTKTKMKR |                                                           | 170                            |               |        |     |
| <i>M. musculus</i>         | EEEEEMDQESDDFDPSDDSSREDEHTNSVNTCSVSDLPAHQLS-SPFYTKTKMKR    |                                                           | 173                            |               |        |     |
| <i>B. taurus</i>           | TLESVTYLPEKGLYCLRPNRST--H-GGTESLKGKNPEN---MGFYTLKMI FYKMKR |                                                           | 90                             |               |        |     |
| <i>G. gallus</i>           | VEEEEEMDQESDDFDQSDSSREDEHANSVNTSSSLIDLPIHQ---SSPFYIKTKMKR  |                                                           | 166                            |               |        |     |
| <i>X. laevis</i>           | EE---EMDQSDDFEQSDSSREDEHRNNDIPNSNSMVDMPINQ--QSI CFNPKSKMKR |                                                           | 165                            |               |        |     |
|                            | <b>S176* S182*</b>                                         | <b>S203 T205*</b>                                         | <b>T226/S227*</b>              |               |        |     |
| <i>H. sapiens</i>          | KLDHGS                                                     | EVRSFSLGKKPKVSEYTTTGLVPC                                  | SATPTTFGDLRAANGQGQRRRITSVQP    | 230           |        |     |
| <i>M. musculus</i>         | KLDHGS                                                     | EVRSFSLGKKPKVSDYTTTGLVPC                                  | SATPTTFGDLRAANGQGQRRRITSVQP    | 233           |        |     |
| <i>B. taurus</i>           | KLDHGS                                                     | EVRSFSLGKKPKVSEYTTTGLVPC                                  | SATPTTFGDLRAANGQGQRRRITSVQP    | 150           |        |     |
| <i>G. gallus</i>           | KLDHGS                                                     | EVRSFSLGKKPKVSEYTTTGLVPC                                  | SATPTTFGDLRAANGQGQRRRITSVQP    | 225           |        |     |
| <i>X. laevis</i>           | KLDHGS                                                     | EVRSFSLGKKPKVSEYTTTGLVPC                                  | SATPTTFGDLRAANGQGQRRRITSVQP    | 226           |        |     |
| <b>Dimerization domain</b> |                                                            |                                                           |                                |               |        |     |
| <i>H. sapiens</i>          | PTGLQEWLKMFSWSGPEKLLALDELID                                | SCEPTQVKHMMQVIEPQQRDFISLLPKELAL                           | 290                            |               |        |     |
| <i>M. musculus</i>         | PTGLQEWLKMFSWSGPEKLLALDELID                                | SCEPTQVKHMMQVIEPQQRDFISLLPKELAL                           | 293                            |               |        |     |
| <i>B. taurus</i>           | PTGLQEWLKMFSWSGPEKLLALDELID                                | SCEPTQVKHMMQVIEPQQRDFISLLPKELAL                           | 210                            |               |        |     |
| <i>G. gallus</i>           | PTGLQEWLKMFSWSGPEKLLALDELID                                | SCEPTQVKHMMQVIEPQQRDFISLLPKELAL                           | 285                            |               |        |     |
| <i>X. laevis</i>           | PTGLQEWLKMFSWSGPEKLLALDELID                                | SCEPTQVKHMMQVIEPQQRDFISLLPKELAL                           | 286                            |               |        |     |
| <b>F-box</b>               |                                                            |                                                           |                                |               |        |     |
| <i>H. sapiens</i>          | YVLSFLEPKDLLQAAQTCRYWRILAEDNLLWREK                         | CKEEGIDEPLHIKRRKVIKPGFIHSP                                | 350                            |               |        |     |
| <i>M. musculus</i>         | YVLSFLEPKDLLQAAQTCRYWRILAEDNLLWREK                         | CKEEGIDEPLHIKRRKVIKPGFIHSP                                | 353                            |               |        |     |
| <i>B. taurus</i>           | YVLSFLEPKDLLQAAQTCRYWRILAEDNLLWREK                         | CKEEGIDEPLHIKRRKVIKPGFIHSP                                | 270                            |               |        |     |
| <i>G. gallus</i>           | YVLSFLEPKDLLQAAQTCRYWRILAEDNLLWREK                         | CKEEGIDEPLHIKRRKVIKPGFIHSP                                | 345                            |               |        |     |
| <i>X. laevis</i>           | YVLSFLDPKDLLHAAQTCRYWRILAEDNLLWREK                         | CKDDGIDEPLHIKRRKVIKPGFTHSP                                | 346                            |               |        |     |
| <b>F-box</b>               |                                                            |                                                           |                                |               |        |     |
| <i>H. sapiens</i>          | WKSAYIRQHRIDTNWRRGELK                                      | SPKVLKRGHDDHVTCLQFCGNRIVSGSDDNTLKVWSAVT                   | 410                            |               |        |     |
| <i>M. musculus</i>         | WKSAYIRQHRIDTNWRRGELK                                      | SPKVLKRGHDDHVTCLQFCGNRIVSGSDDNTLKVWSAVT                   | 413                            |               |        |     |
| <i>B. taurus</i>           | WKSAYIRQHRIDTNWRRGELK                                      | SPKVLKRGHDDHVTCLQFCGNRIVSGSDDNTLKVWSAVT                   | 330                            |               |        |     |
| <i>G. gallus</i>           | WKSAYIRQHRIDTNWRRGELK                                      | SPKVLKRGHD-HVITCLQFCGNRIVSGSDDNTLKVWSAVT                  | 404                            |               |        |     |
| <i>X. laevis</i>           | WKSAYIRQHRIDTNWRRGELK                                      | SPKVLKRGHDDHVTCLQFCGNRIVSGSDDNTLKVWSAVT                   | 406                            |               |        |     |
| <b>WD1</b>                 |                                                            |                                                           |                                |               |        |     |
| <i>H. sapiens</i>          | GKCLRTL                                                    | VGHHTGGVWSSQMRDNIISGSTDRTLKVVNAETGECIHTLYGHTSTVRCMHLH     | 470                            |               |        |     |
| <i>M. musculus</i>         | GKCLRTL                                                    | VGHHTGGVWSSQMRDNIISGSTDRTLKVVNAETGECIHTLYGHTSTVRCMHLH     | 473                            |               |        |     |
| <i>B. taurus</i>           | GKCLRTL                                                    | VGHHTGGVWSSQMRDNIISGSTDRTLKVVNAETGECIHTLYGHTSTVRCMHLH     | 390                            |               |        |     |
| <i>G. gallus</i>           | GKCLRTL                                                    | VGHHTGGVWSSQMRDNIISGSTDRTLKVVNAETGECIHTLYGHTSTVRCMHLH     | 464                            |               |        |     |
| <i>X. laevis</i>           | GKCLRTL                                                    | VGHHTGGVWSSQMRDNIISGSTDRTLKVVNAETGECIHTLYGHTSTVRCMHLH     | 466                            |               |        |     |
| <b>WD2</b>                 |                                                            |                                                           |                                |               |        |     |
| <i>H. sapiens</i>          | EKR                                                        | VVSGSRDATLRVWDIETGQCLHVLMGHVAAVRCVQYDGRRVVSGAYDFMVKVWDPET | 530                            |               |        |     |
| <i>M. musculus</i>         | EKR                                                        | VVSGSRDATLRVWDIETGQCLHVLMGHVAAVRCVQYDGRRVVSGAYDFMVKVWDPET | 533                            |               |        |     |
| <i>B. taurus</i>           | EKR                                                        | VVSGSRDATLRVWDIETGQCLHVLMGHVAAVRCVQYDGRRVVSGAYDFMVKVWDPET | 450                            |               |        |     |
| <i>G. gallus</i>           | EKR                                                        | VVSGSRDATLRVWDIETGQCLHVLMGHVAAVRCVQYDGRRVVSGAYDFMVKVWDPET | 524                            |               |        |     |
| <i>X. laevis</i>           | EKR                                                        | VVSGSRDATLRVWNIETGQCLHVLMGHVAAVRCVQYDGRRVVSGAYDFMVKVWDPET | 526                            |               |        |     |
| <b>WD3</b>                 |                                                            |                                                           |                                |               |        |     |
| <i>H. sapiens</i>          | ETCLHTL                                                    | QGHHTNRVYSLQFDGIHVVSGSLDTSIRVWDVETGNCIHTLTGHQSLTSGMELK    | 590                            |               |        |     |
| <i>M. musculus</i>         | ETCLHTL                                                    | QGHHTNRVYSLQFDGIHVVSGSLDTSIRVWDVETGNCIHTLTGHQSLTSGMELK    | 593                            |               |        |     |
| <i>B. taurus</i>           | ETCLHTL                                                    | QGHHTNRVYSLQFDGIHVVSGSLDTSIRVWDVETGNCIHTLTGHQSLTSGMELK    | 510                            |               |        |     |
| <i>G. gallus</i>           | ETCLHTL                                                    | QGHHTNRVYSLQFDGIHVVSGSLDTSIRVWDVETGNCIHTLTGHQSLTSGMELK    | 584                            |               |        |     |
| <i>X. laevis</i>           | ETCLHTL                                                    | QGHHTNRVYSLQFDGIHVVSGSLDTSIRVWDVETGNCIHTLTGHQSLTSGMELK    | 586                            |               |        |     |
| <b>WD4</b>                 |                                                            |                                                           |                                |               |        |     |
| <i>H. sapiens</i>          | DNILVSGNADSTVKIWDIKTGQCLQTLQ                               | GP                                                        | NKHQSAVTCLOFNKNFVITSSDDGTVKLWD | 650           |        |     |
| <i>M. musculus</i>         | DNILVSGNADSTVKIWDIKTGQCLQTLQ                               | GPS                                                       | NKHQSAVTCLOFNKNFVITSSDDGTVKLWD | 653           |        |     |
| <i>B. taurus</i>           | DNILVSGNADSTVKIWDIKTGQCLQTLQ                               | GP                                                        | NKHQSAVTCLOFNKNFVITSSDDGTVKLWD | 570           |        |     |
| <i>G. gallus</i>           | DNILVSGNADSTVKIWDIKTGQCLQTLQ                               | GP                                                        | NKHQSAVTCLOFNKNFVITSSDDGTVKLWD | 644           |        |     |
| <i>X. laevis</i>           | DNILVSGNADSTVKIWDIKTGQCLQTLQ                               | GP                                                        | NKHQSAVTCLOFNKNFVITSSDDGTVKLWD | 646           |        |     |
| <b>WD5</b>                 |                                                            |                                                           |                                |               |        |     |
| <i>H. sapiens</i>          | LKTGEFIRNLV                                                | TLES                                                      | GGSGGVVWRIRASNTKLVCAVGS        | RNGTEETKLLVLD | FVDVKM | 707 |
| <i>M. musculus</i>         | LKTGEFIRNLV                                                | TLES                                                      | GGSGGVVWRIRASNTKLVCAVGS        | RNGTEETKLLVLD | FVDVKM | 710 |
| <i>B. taurus</i>           | LKTGEFIRNLV                                                | TLES                                                      | GGSGGVVWRIRASNTKLVCAVGS        | RNGTEETKLLVLD | FVDVKM | 627 |
| <i>G. gallus</i>           | LKTGEFIRNLV                                                | TLES                                                      | GGSGGVVWRIRASNTKLVCAVGS        | RNGTEETKLLVLD | FVDVKM | 701 |
| <i>X. laevis</i>           | LKTGEFIRNLV                                                | TLES                                                      | GGSGGVVWRIRASNTKLVCAVGS        | RNGTEETKLLVLD | FVDVKM | 703 |
| <b>WD6</b>                 |                                                            |                                                           |                                |               |        |     |
| <b>WD7</b>                 |                                                            |                                                           |                                |               |        |     |

**E**

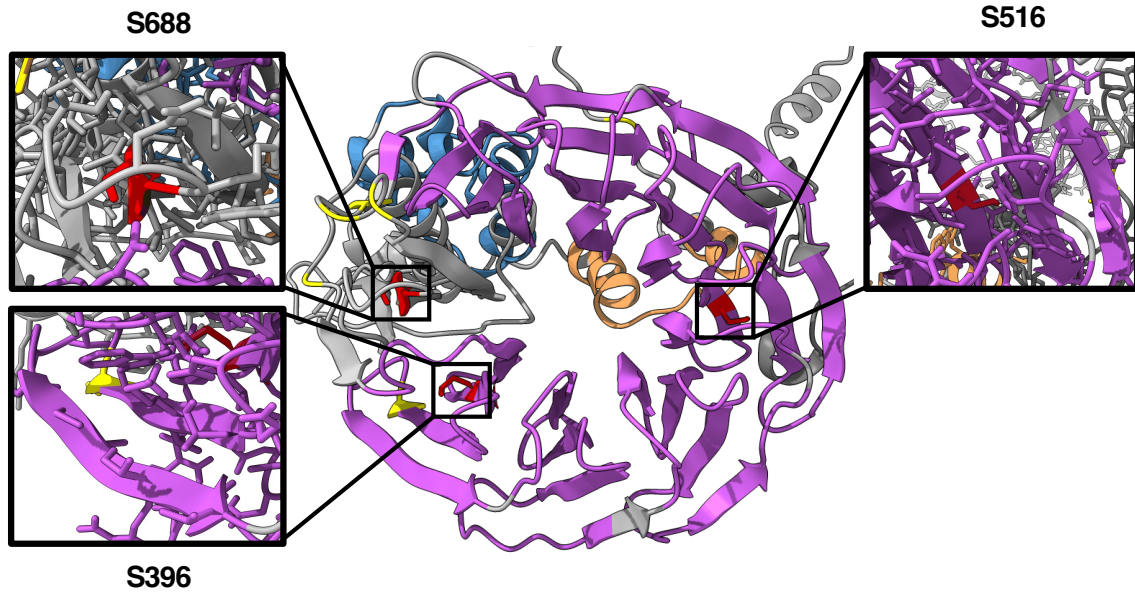

**F**

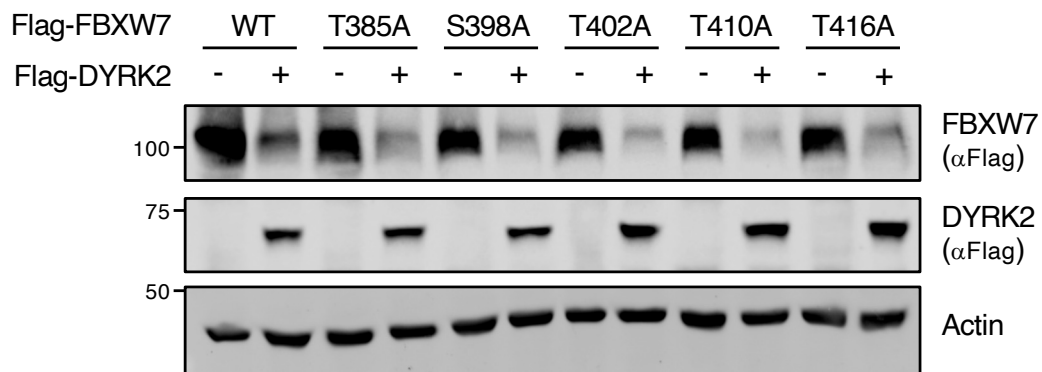

**G**

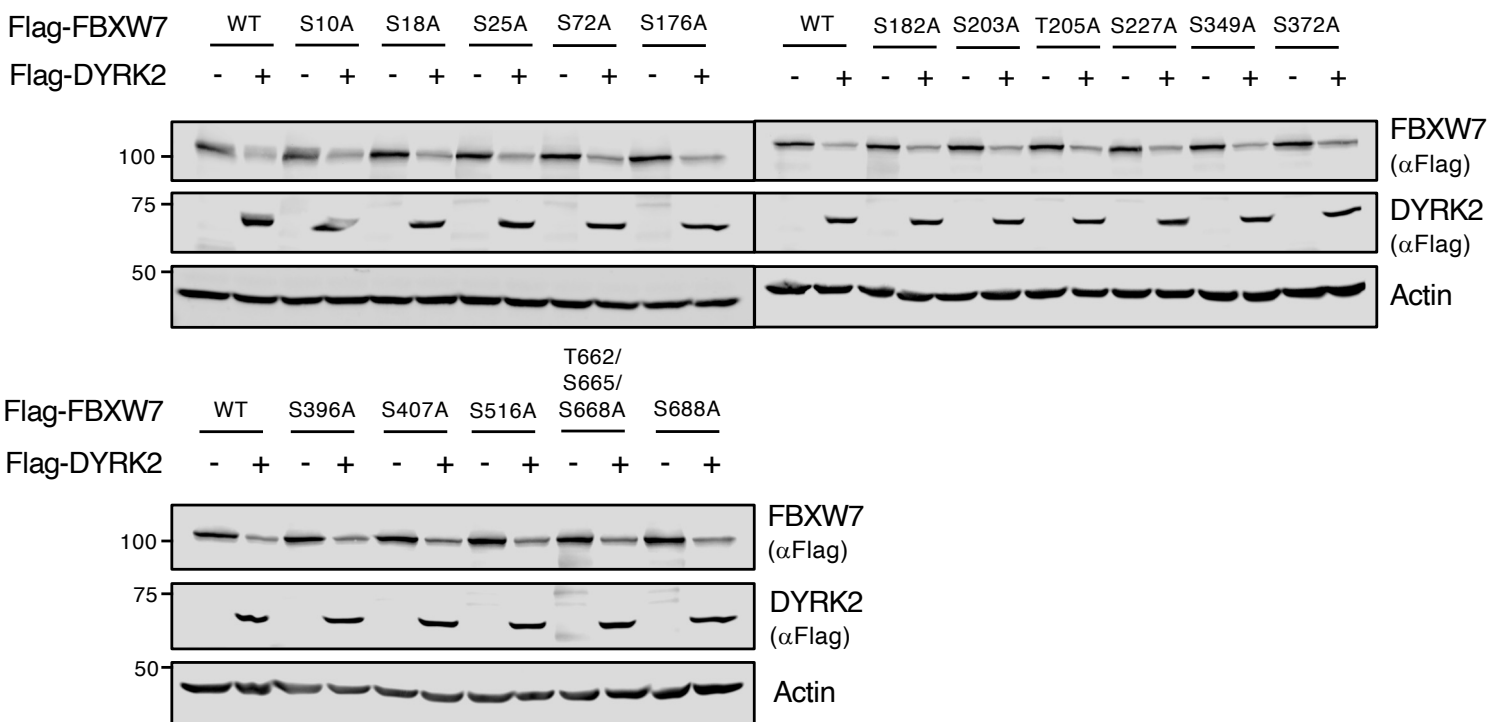

H

**INPUT:**

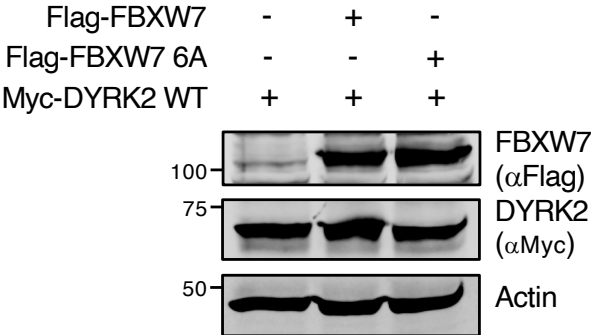

**IP:**

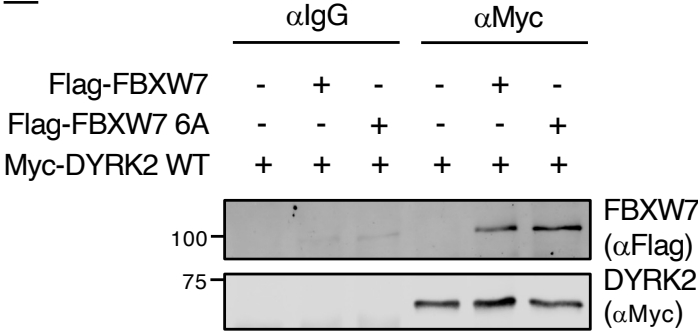

A

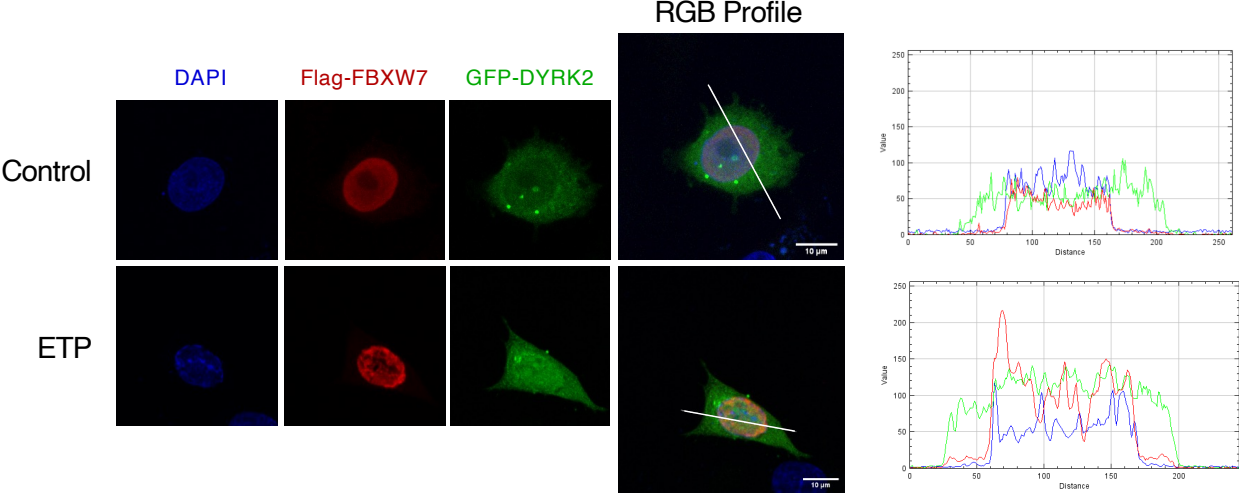

# Supplemental Figure 4

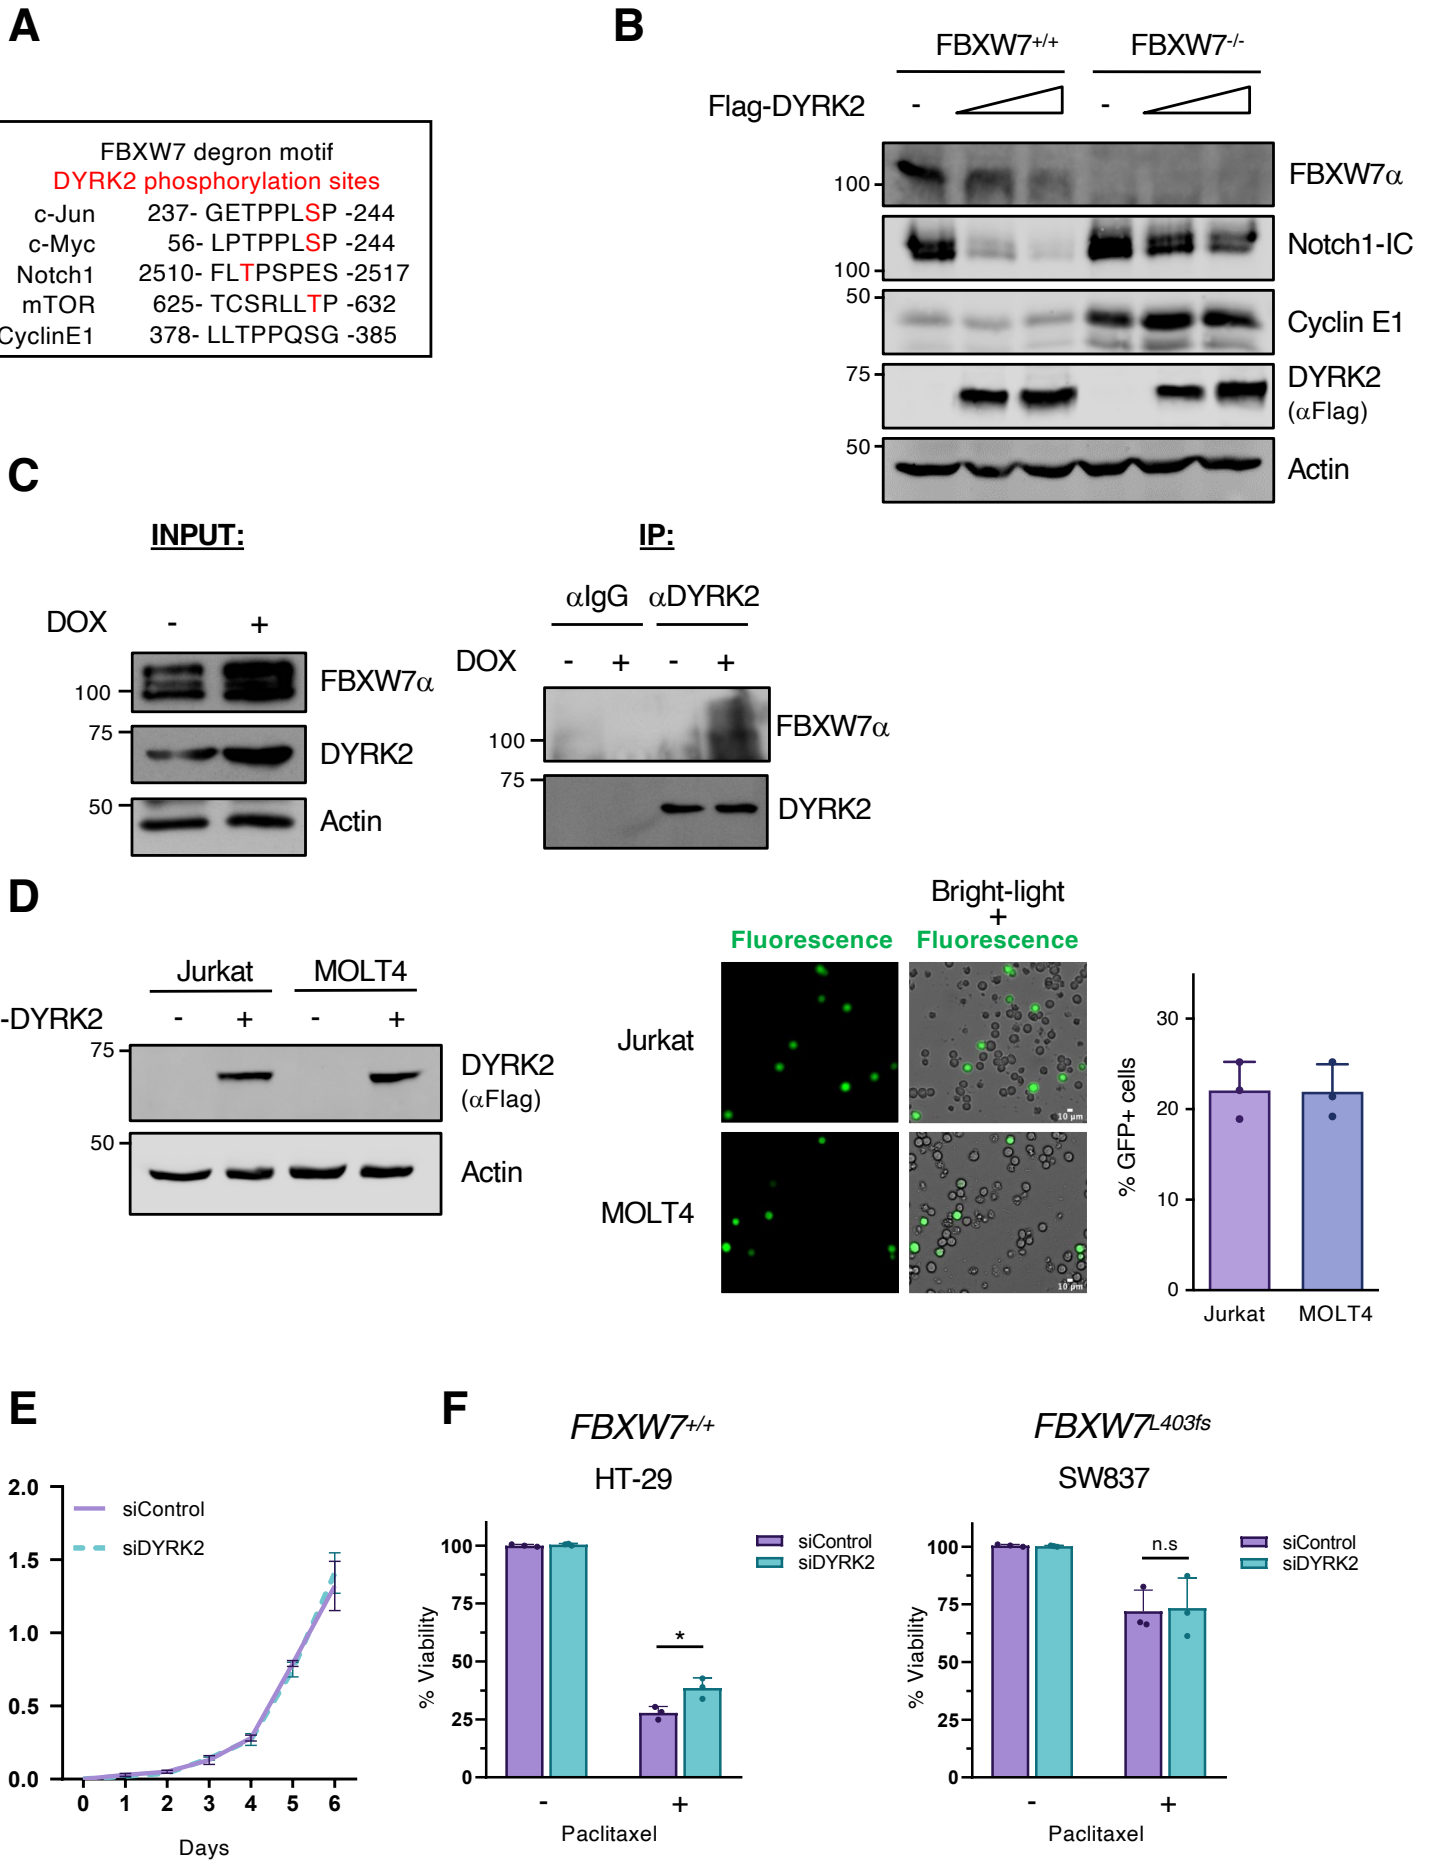



# Supplemental Figure 5

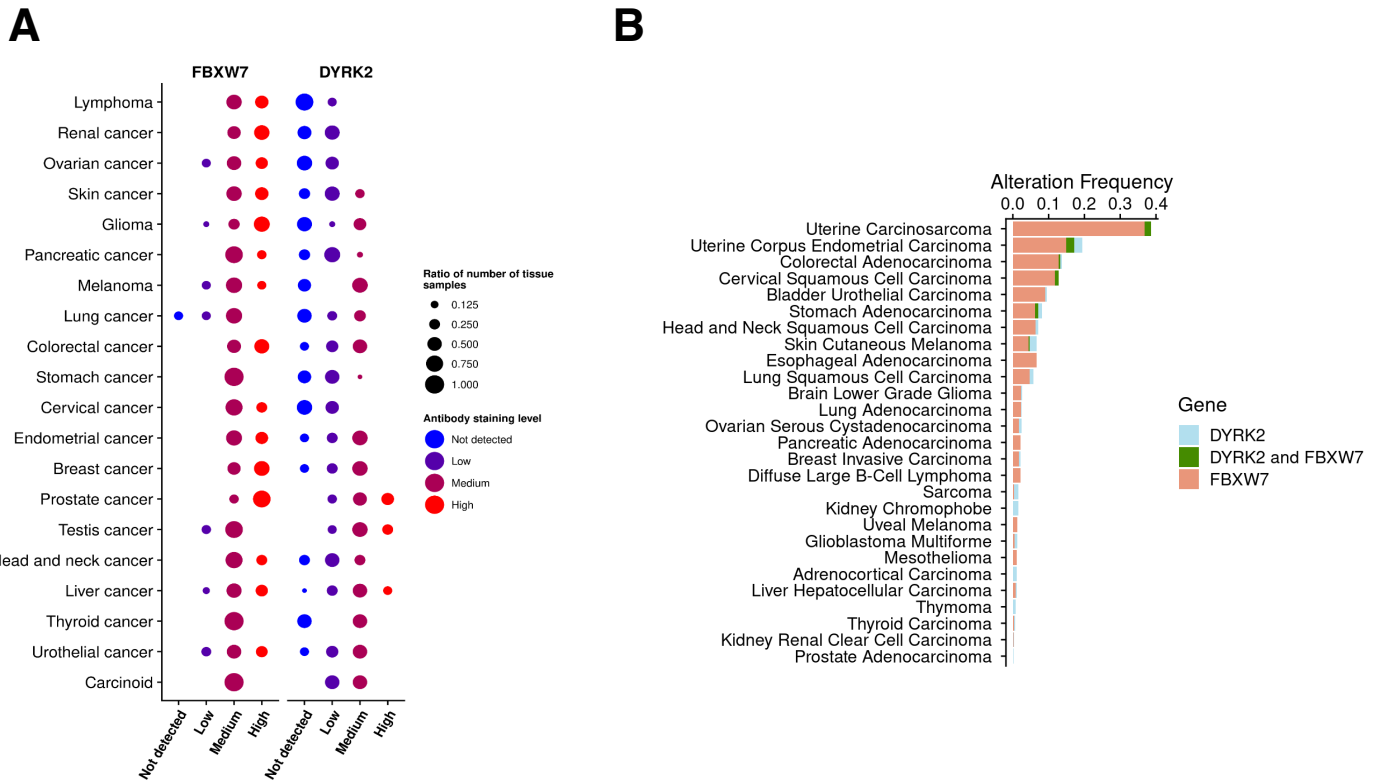

Supplement: 41419_2023_5724_MOESM2_ESM.pdf [file 41419_2023_5724_MOESM2_ESM.pdf]
