# Supplementary material for: FBXW7 tumor suppressor regulation by dualspecificity tyrosine-regulated kinase 2
Source: PubMed Central journal article supplement (PMC10024693; doi:10.1038/s41419-023-05724-0), 2023-03-18

# Original Western Blot

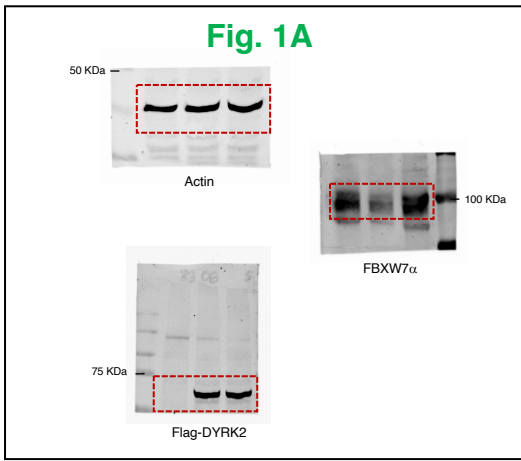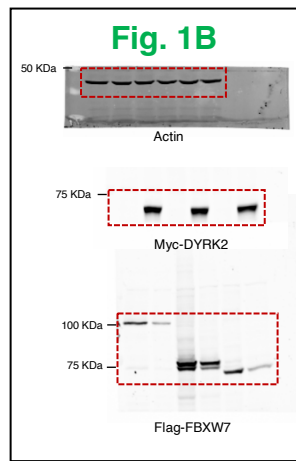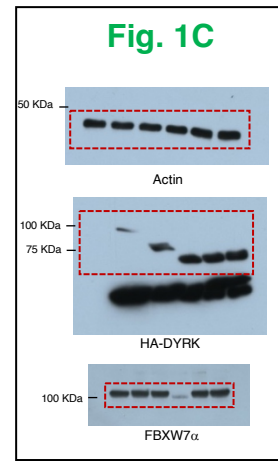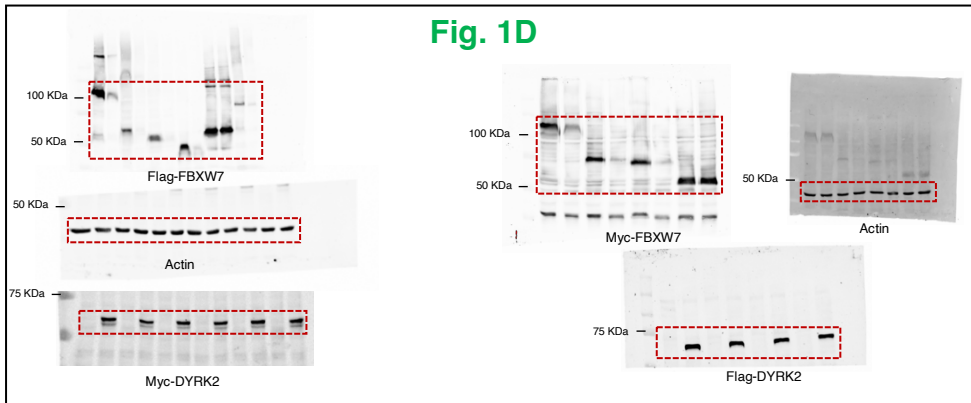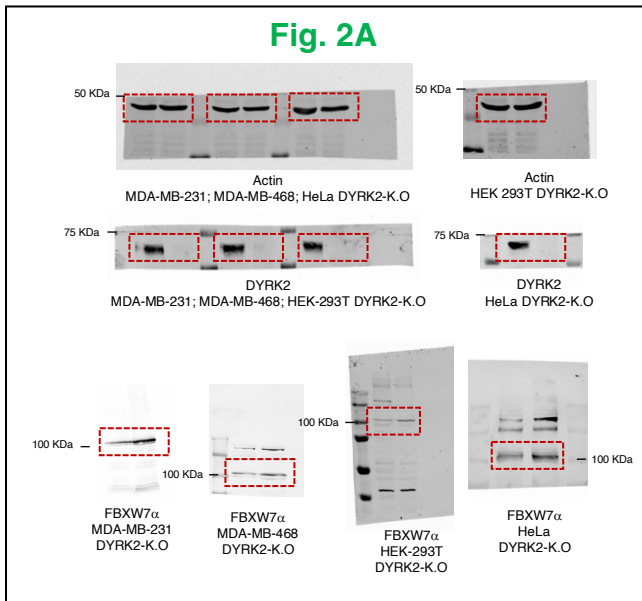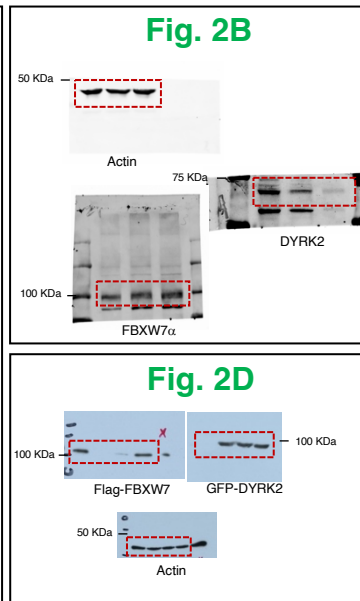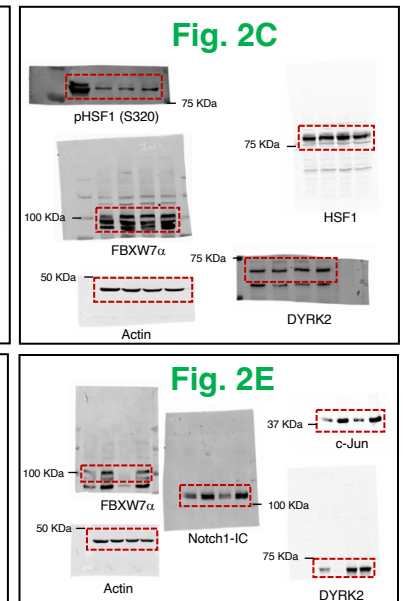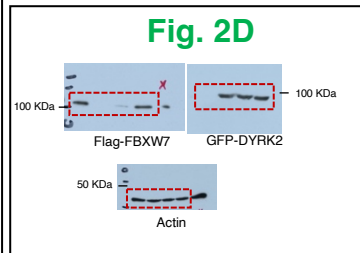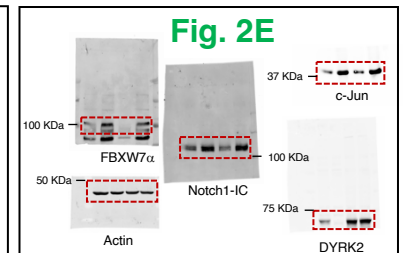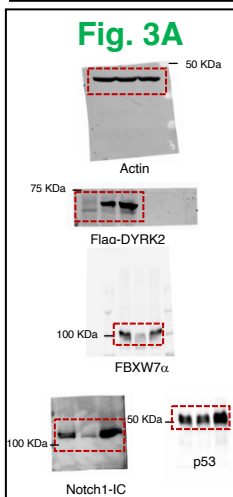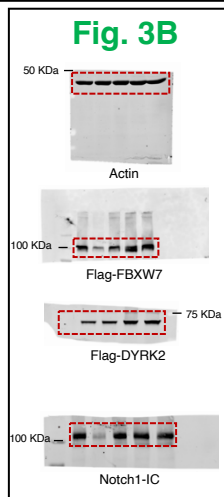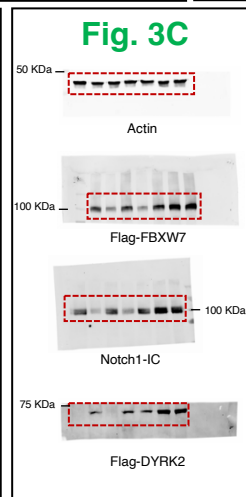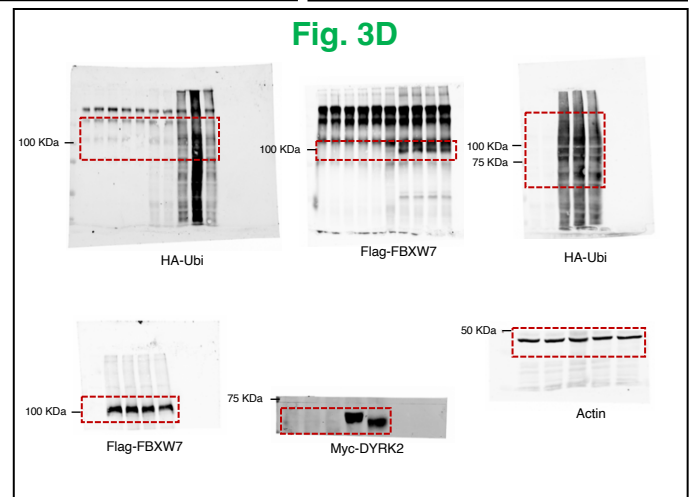

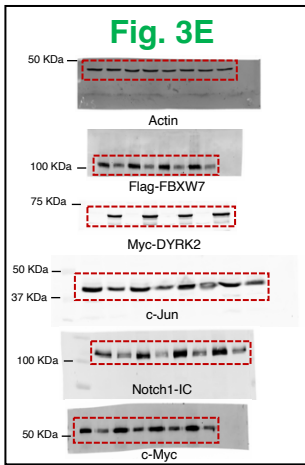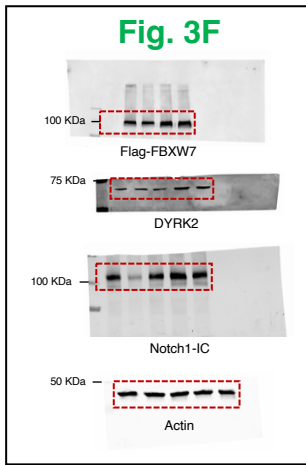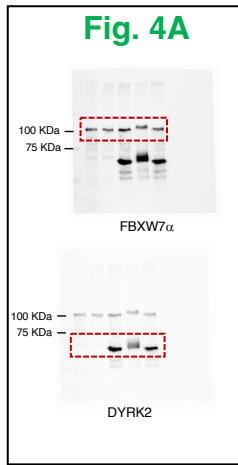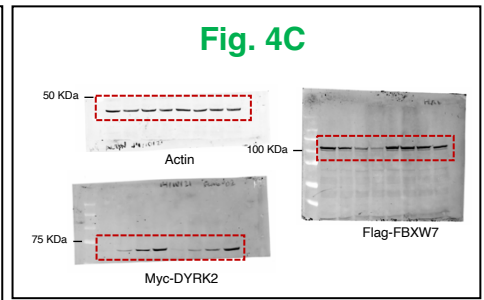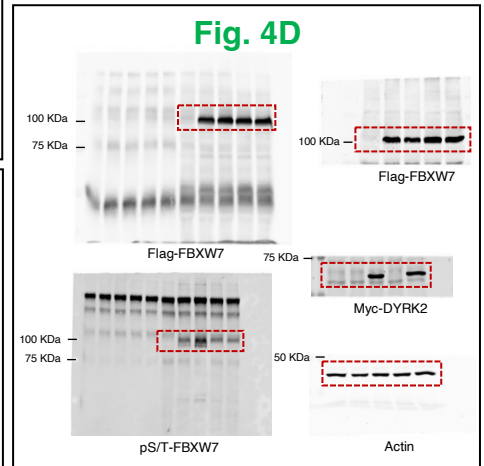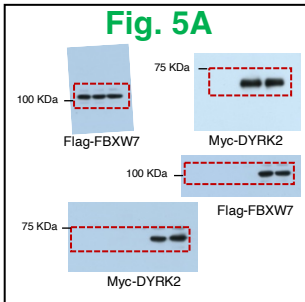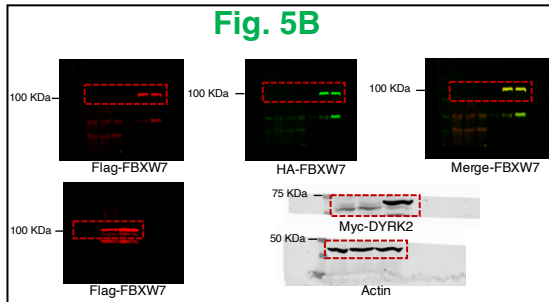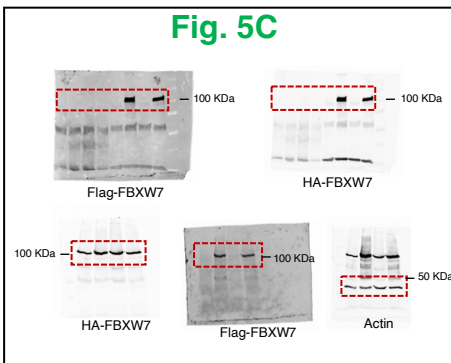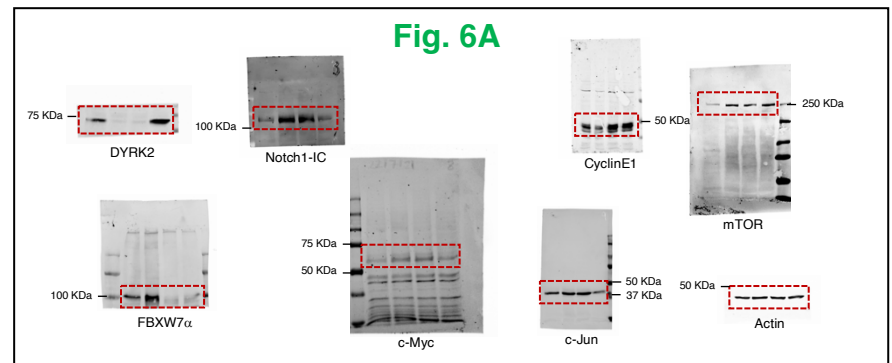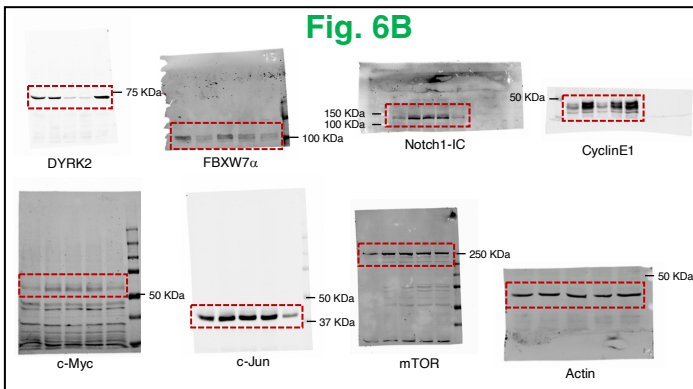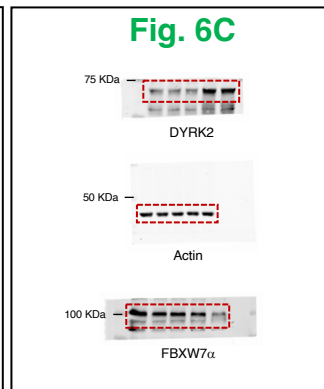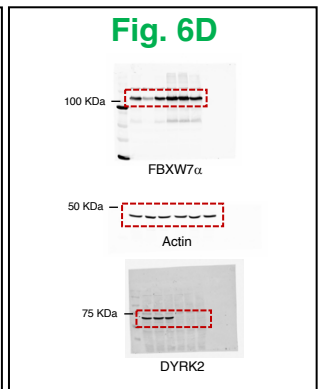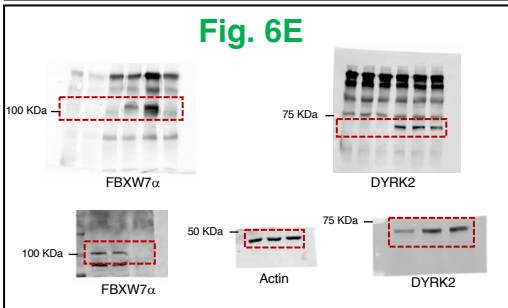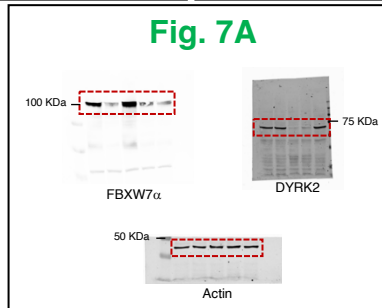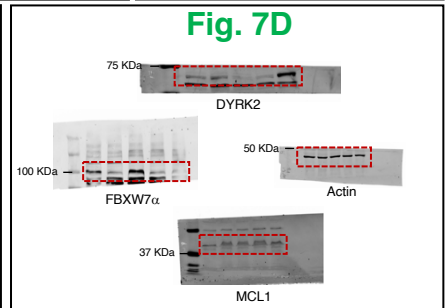

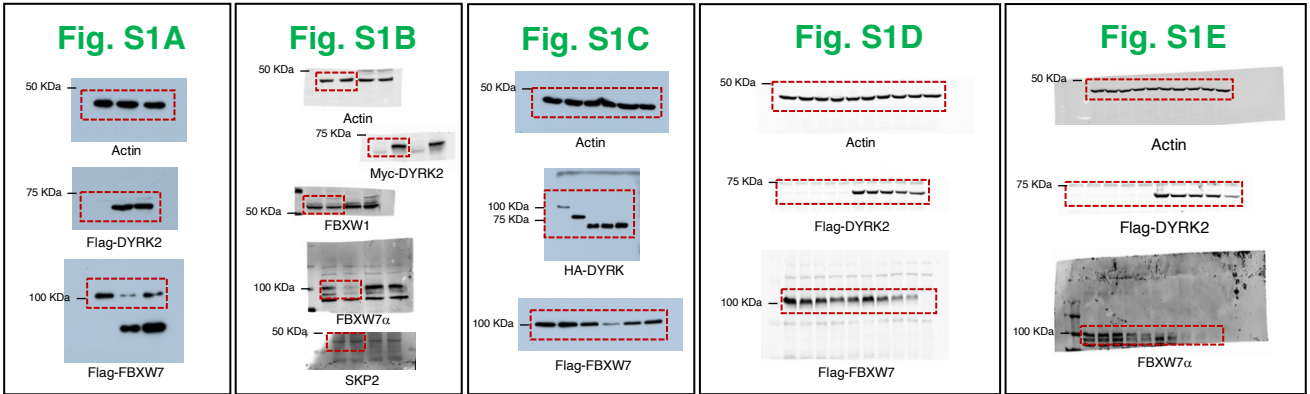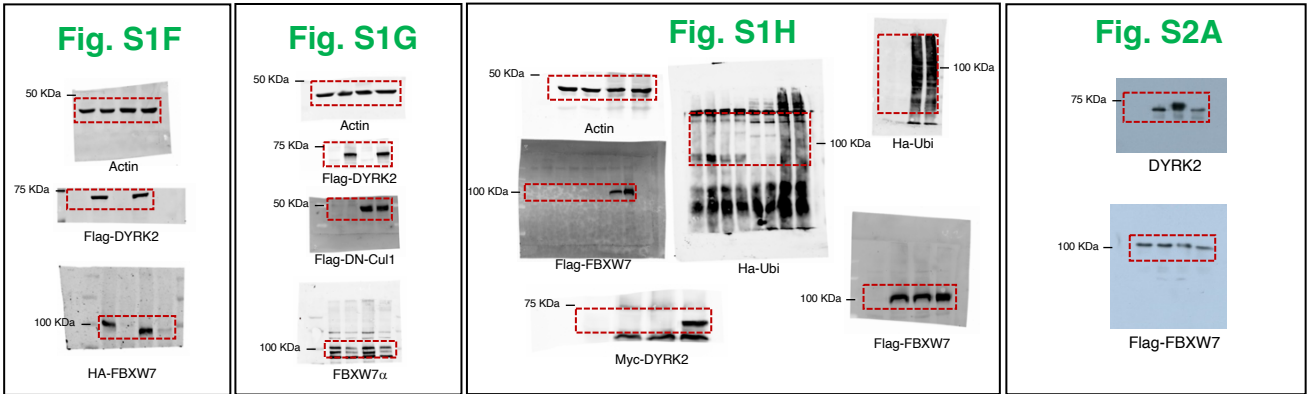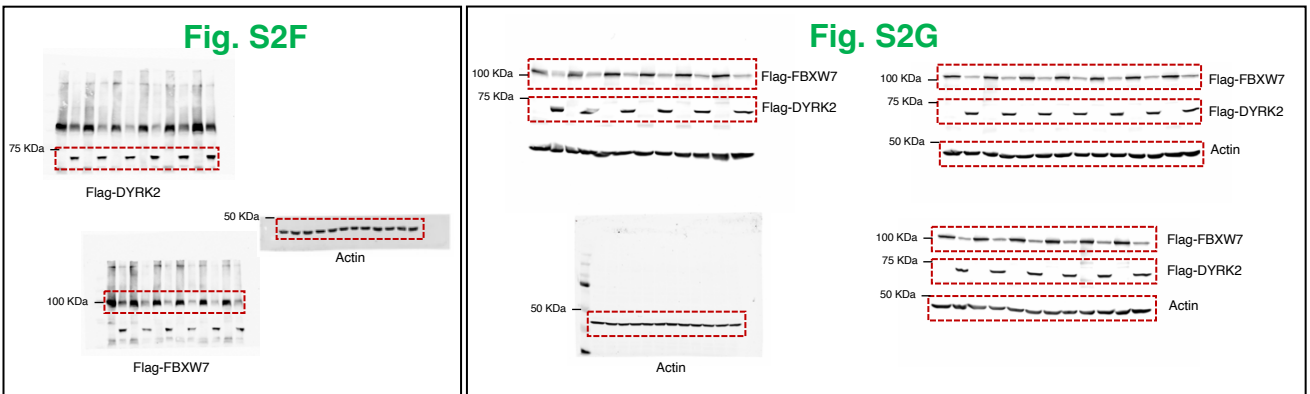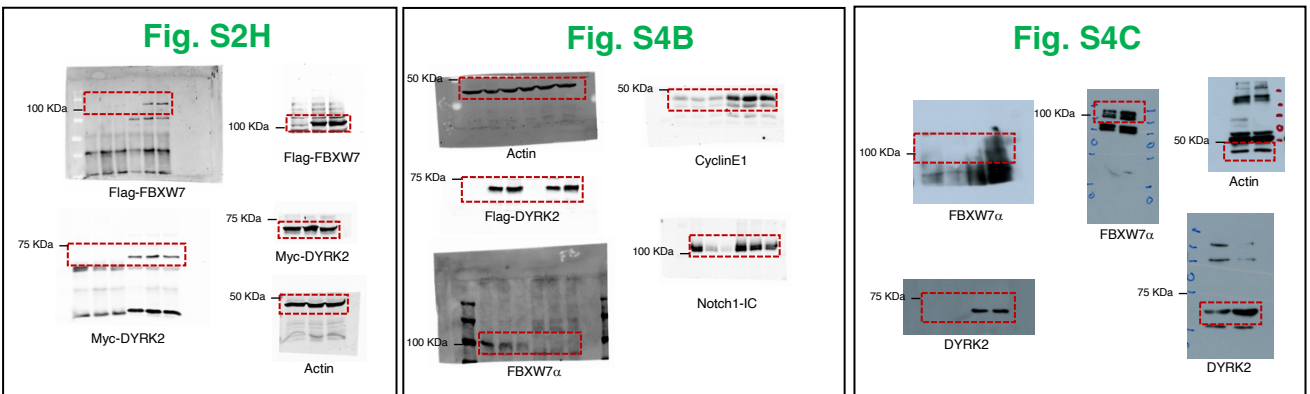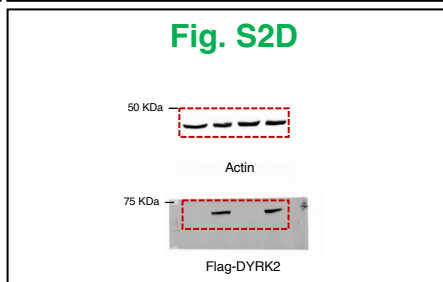

Supplement: 41419_2023_5724_MOESM7_ESM.pdf [file 41419_2023_5724_MOESM7_ESM.pdf]
